# Supplementary material for: Self-limited conversion of MoO2into ultramicro MoS2nanosheets on graphene/CNTs matrix for hydrogen evolution with excellent stability
Source: Royal Society of Chemistry journal article supplement (doi:10.1039/c9se01301f), 2020-01-01
Supplement: c9se01301f1.pdf [file c9se01301f1.pdf]

Supporting Information

**Self-limited Conversion of MoO<sub>2</sub> into ultramicro MoS<sub>2</sub> nanosheets on graphene/CNTs matrix for hydrogen evolution with excellent stability**

Jingyang Tian,<sup>a</sup> Jiaxin Li,<sup>a</sup> Anlin Feng,<sup>a</sup> Xinran Han,<sup>a</sup> Yuancai Lv,<sup>b\*</sup> Mingyang Ma <sup>a</sup>  
and Chong Lin <sup>\*a</sup>

<sup>a</sup> Jiangxi Province Key Laboratory of Polymer Micro/Nano Manufacturing and Devices, School of Chemistry, Biology and Materials Science, East China University of Technology, Nanchang, 330013, People's Republic of China.

<sup>b</sup> Fujian Provincial Engineering Research Center for High-value Utilization Technology of Plant Resources, College of Environment & Resources, Fuzhou University, Fuzhou 350116, People's Republic of China.

\*Corresponding author: donkey1204@hotmail.com (Yuancai Lv); clin2008@163.com (Chong Lin)

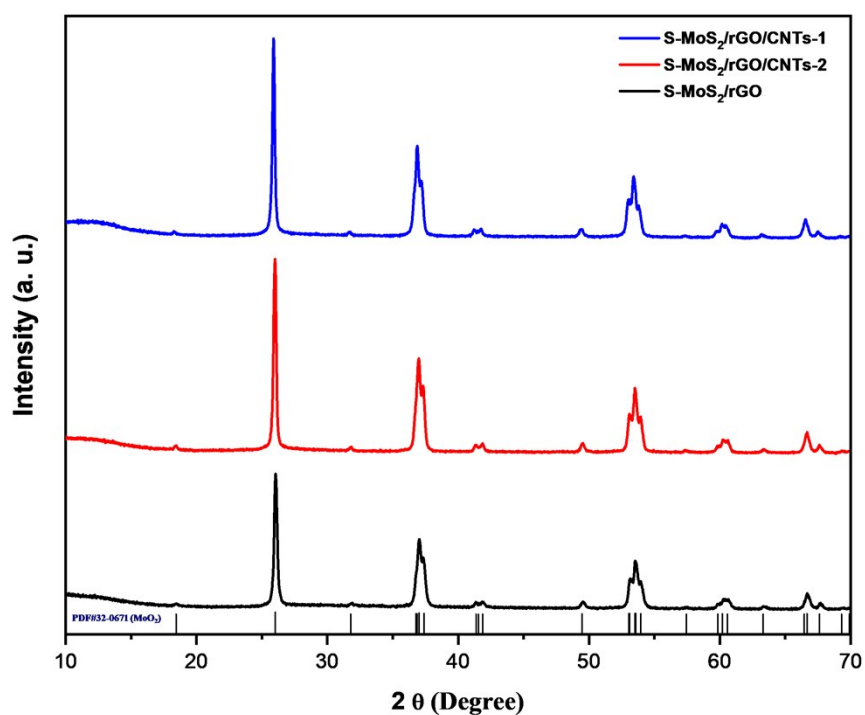

**Figure S1.** XRD patterns of the S-MoO<sub>2</sub>/rGO/CNTs-1, -2 and S-MoO<sub>2</sub>/rGO.

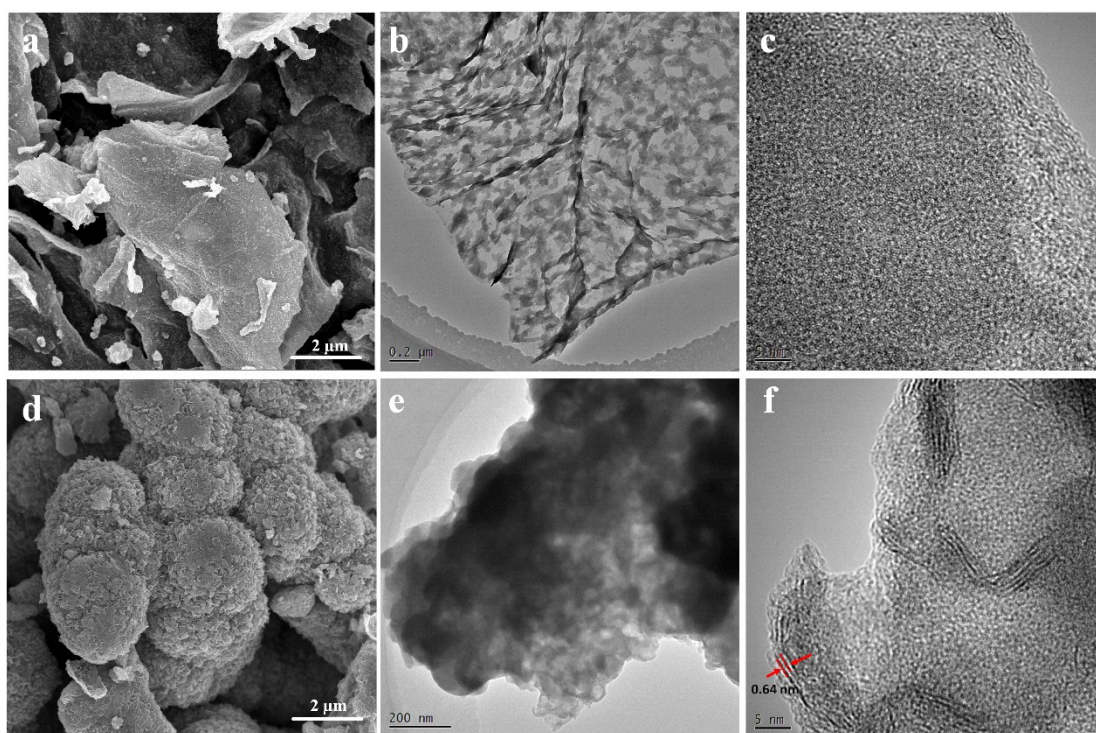

**Figure S2.** Morphological characterizations of the catalysts. (a) SEM and (b, c) TEM images of S-MoS<sub>2</sub>/rGO. (d) SEM and (e, f) TEM images of bulk MoS<sub>2</sub>.

**Table S1.** Textural properties of MoS<sub>2</sub>-based materials.

| Sample                         | $S_{\text{BET}}^a$<br>(m <sup>2</sup> g <sup>-1</sup> ) | $V_{\text{totle}}^b$<br>(cm <sup>3</sup> g <sup>-1</sup> ) | Pore diameter <sup>d</sup><br>(nm) |
|--------------------------------|---------------------------------------------------------|------------------------------------------------------------|------------------------------------|
| S-MoS <sub>2</sub> /rGO/CNTs-1 | 44.1                                                    | 0.489                                                      | 3.82                               |
| S-MoS <sub>2</sub> /rGO        | 25.1                                                    | 0.237                                                      | 3.82                               |
| MoS <sub>2</sub>               | 6.1                                                     | 0.085                                                      | 17.44                              |

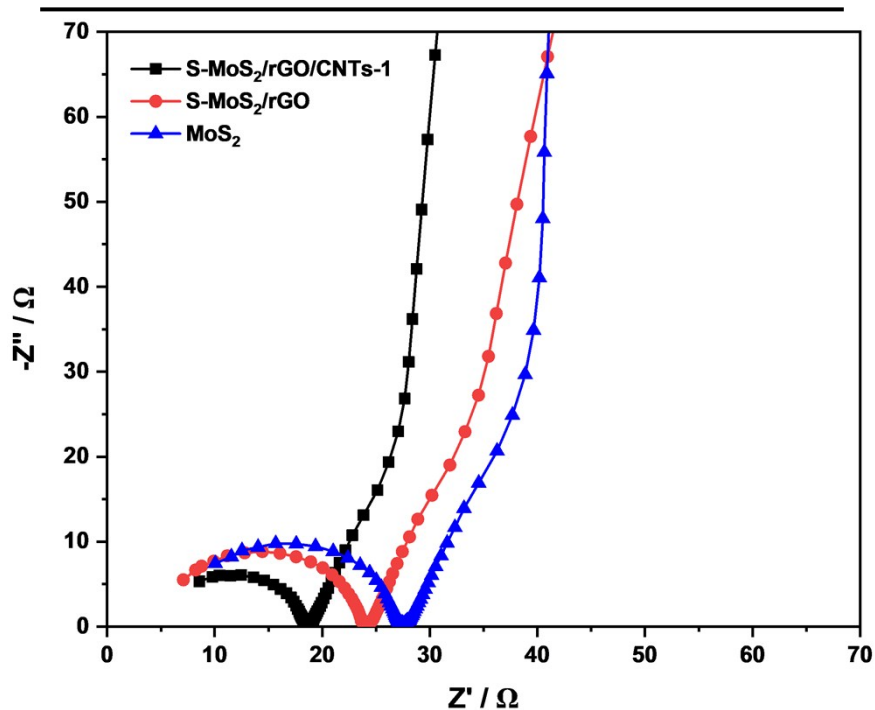

**Figure S3.** Nyquist plots of the catalysts at overpotential of 160 mV vs. RHE.

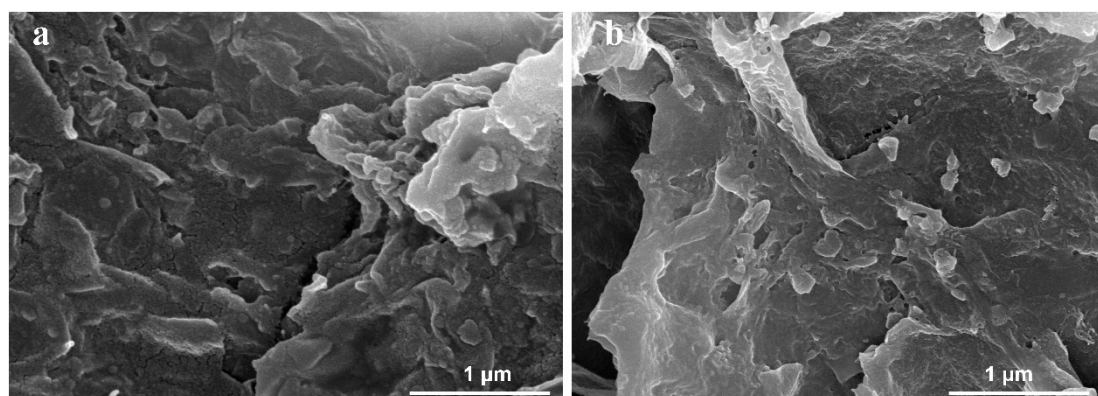

**Figure S4.** SEM images of S-MoS<sub>2</sub>/rGO/CNTs-1 (a) before and (b) after stability test.

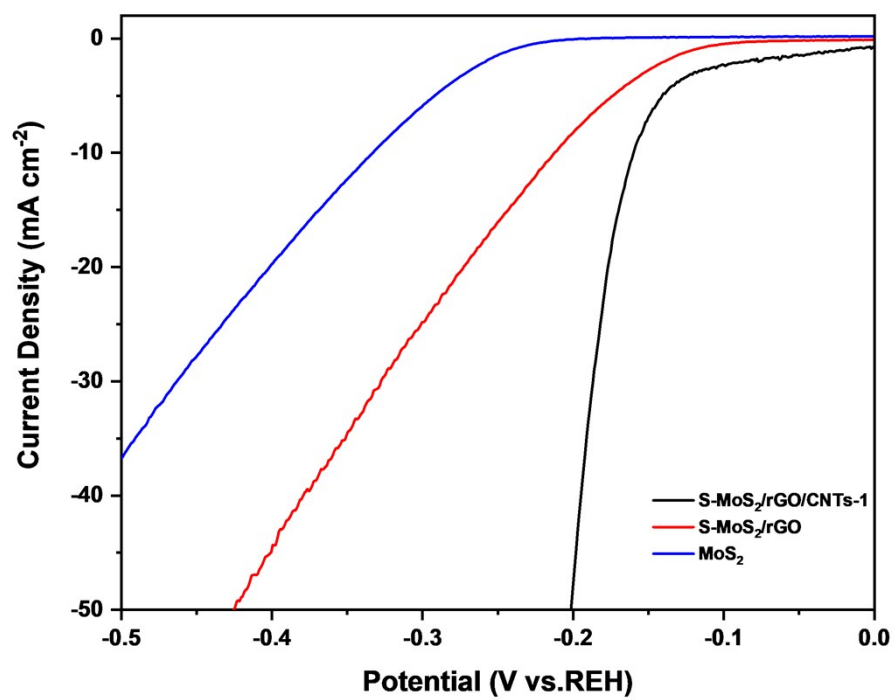

**Figure S5.** The LSV curves of the catalysts after long-term stability test.
